# Supplementary material for: Interactions between Rice Resistance to Planthoppers and Honeydew-Related Egg Parasitism under Varying Levels of Nitrogenous Fertilizer
Source: MDPI journal article supplement (doi:10.3390/insects13030251), 2022-03-01
Supplement: s1 [file s1]

**Table S1.** Oviposition by planthoppers and leafhoppers on IR64 (susceptible) and IR62 (resistant) sentinel rice plants grown in pots at low (0 added N) and high (150 Kg N ha<sup>-1</sup>) added nitrogen during the dry and wet seasons. Plants were maintained in a screenhouse. Numbers are means  $\pm$  SEM (N = 5)

| Variety and Nitrogen Level       | Number of Eggs per Plant <sup>1</sup> |                    |                    |
|----------------------------------|---------------------------------------|--------------------|--------------------|
|                                  | BPH                                   | WBPH               | GLH                |
| <b>Dry season</b>                |                                       |                    |                    |
| IR62 - 0 added N                 | 96.00 $\pm$ 25.66                     | 68.00 $\pm$ 28.21  | 69.67 $\pm$ 6.57   |
| IR62 - 150 Kg N ha <sup>-1</sup> | 122.00 $\pm$ 16.74                    | 124.00 $\pm$ 12.06 | 145.33 $\pm$ 22.23 |
| IR64 - 0 added N                 | 64.00 $\pm$ 7.21                      | 78.67 $\pm$ 5.04   | 87.67 $\pm$ 11.32  |
| IR64 - 150 Kg N ha <sup>-1</sup> | 106.33 $\pm$ 18.28                    | 142.33 $\pm$ 12.13 | 101.00 $\pm$ 52.51 |
| <b>Wet season</b>                |                                       |                    |                    |
| IR62 - 0 added N                 | 102.50 $\pm$ 24.50                    | 51.33 $\pm$ 19.24  | 5.00 $\pm$ 5.00    |
| IR62 - 150 Kg N ha <sup>-1</sup> | 102.33 $\pm$ 17.40                    | 116.67 $\pm$ 58.05 | 10.33 $\pm$ 10.33  |
| IR64 - 0 added N                 | 119.67 $\pm$ 8.74                     | 57.33 $\pm$ 44.52  | 12.67 $\pm$ 8.57   |
| IR64 - 150 Kg N ha <sup>-1</sup> | 110.00 $\pm$ 17.62                    | 70.33 $\pm$ 30.07  | 18.00 $\pm$ 7.55   |
| Variety (V) <sup>2</sup>         | 0.366ns                               | 0.438ns            | 1.471ns            |
| Nitrogen (N) <sup>2</sup>        | 1.235ns                               | 2.781ns            | 8.372**            |
| Season (S) <sup>2</sup>          | 1.204ns                               | 1.152ns            | 62.987***          |

<sup>1</sup>: BPH = brown planthopper, WBPH = whitebacked planthopper, GLH = green leafhopper; <sup>2</sup>: ns =  $p > 0.05$ ; \*\* =  $p \leq 0.01$ , \*\*\* =  $p \leq 0.001$ ; all interactions were non-significant
